# Supplementary material
Source: PubMed Central journal article supplement (PMC3075022)
Supplement: supp_01104.2009_legends.pdf [file supp_01104.2009_legends.pdf]

1 Supplemental Figure 1: Identification of Primary EPCs.

2 (A) Rat bone marrow and human peripheral blood derived EPCs were isolated and  
3 identified by LDL uptake and BS-1 lectin staining. Rat BM derived EPCs formed tube  
4 structures when plated in matrigel. (B) RT-PCR analysis of erbB receptor expression in  
5 various EPC populations demonstrated an identical erbB receptor expression pattern (WH  
6 = whole heart). A smaller PCR product was detected by real time RT-PCR in rat BM  
7 derived EPCs with erbB4 primers. While erbB4 is known to have at least four mRNA  
8 splice variants [6, 17], 2 within the juxtamembrane region (jm-a, jm-b) and 2 within the  
9 cytoplasmic domain (Cyt-1, Cyt-2), the primers used amplify a common region that does  
10 not overlap with these domains. Thus the smaller PCR product observed likely represents  
11 non-specific target amplification. RT-PCR for mouse eEPCs was performed on the same  
12 RNA sample on two different dates resulting in two gels (erbB2 and erbB3 vs. erbB4).

13  
14

15 Supplemental Figure 2: erbB receptor expression and signaling in rat BM-derived EPCs.

16 (A) Immunoblot of rat BM derived EPC lysates showing expression of erbB2, erbB3 and  
17 NRG (B) p-Akt immunoblot of rat BM-derived EPC lysate following NRG treatment.  
18 Representative of at least 3 experiments.

19

20 Supplemental Figure 3: NRG does not affect eEPC adhesion or migration.

21 (A) eEPC adhesion assay. 96-well plates were coated overnight with the indicated  
22 concentrations of human fibronectin or a mixture of fibronectin and NRG-1  $\beta$  (50ng/ml)  
23 in PBS. eEPCs resuspended in serum free media were added to each well (250,000  
24 cells/mL, 200ul per well) and incubated for 1 hour at 37°C. Non adherent cells were then

25 removed and the wells were washed extensively. Adherent cells were quantified by acid  
26 phosphatase assay.(n=3) (B) Transwell migration assay. Transwell inserts were placed in  
27 the wells of a 24 well plate containing 0.5ml serum free media and the indicated  
28 treatments (N= NRG-1 $\beta$  50ng/ml, GW= GW572016 1uM, FCS= fetal calf serum). eEPC  
29 were added to the top portion (50,000 cells in 1ml media) and plates were incubated for  
30 6hrs at 37°C. Cells were fixed and stained. eEPCs on the to portion of the insert were  
31 removed with a cotton swab and cells and the bottom portion were quantified.(n=3 \* p <  
32 0.05).

33

34 Supplemental Figure 4: eEPC accumulate in the myocardium following ischemia and  
35 reperfusion.

36 Langendorff perfused mouse hearts were subjected to 15 minutes of ischemia. At 20  
37 minutes of reperfusion, 5x10<sup>5</sup> eEPCs, fluorescently labeled with the lipophilic tracer  
38 DiIC18(3), were injected in a side port over the course of 30. Hearts were perfused for an  
39 additional 10 minutes then snap frozen liquid nitrogen for cryosectioning. Sections were  
40 mounted in DAPI containing mounting media and eEPC were quantified by microscopy.

41 (A) representative image (B) Quantification of eEPCs/20x field. (n=3, \* p<0.05)

42
