# Supplementary material
Source: PubMed Central journal article supplement (PMC3075022)

# Supplemental Fig 2

A

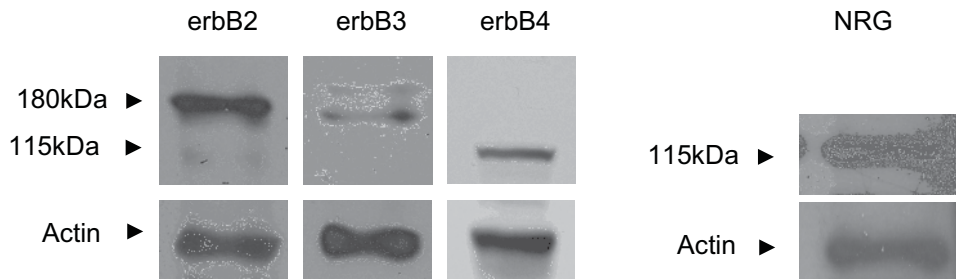

B

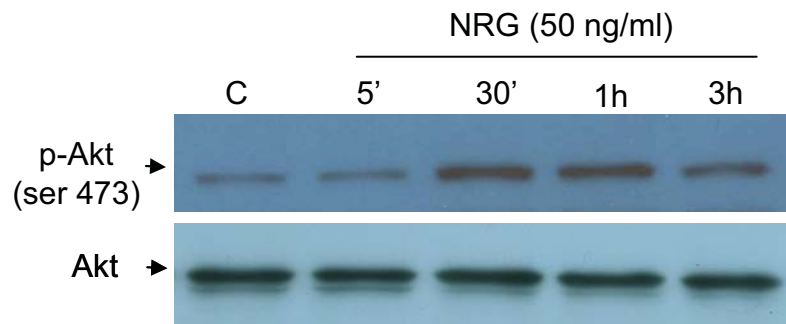

Supplement: supp_01104.2009_figS2.pdf [file supp_01104.2009_figS2.pdf]

# Supplemental Fig 3

A

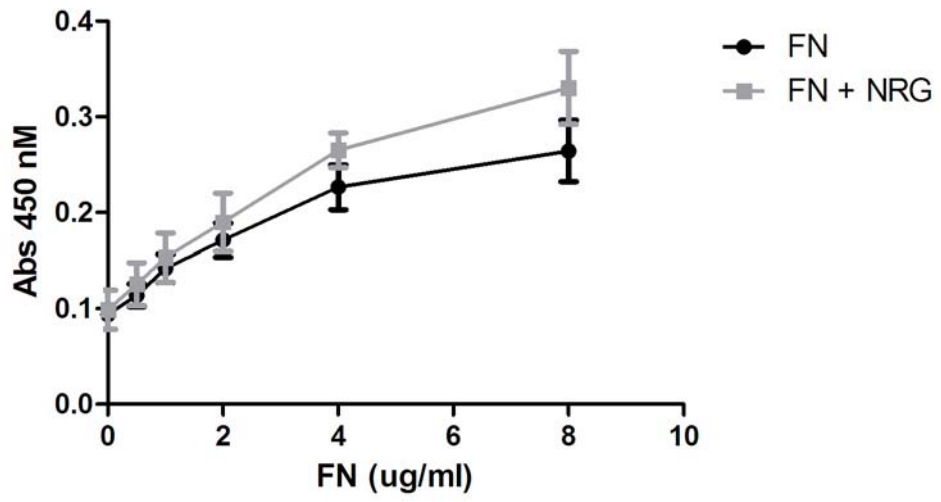

B

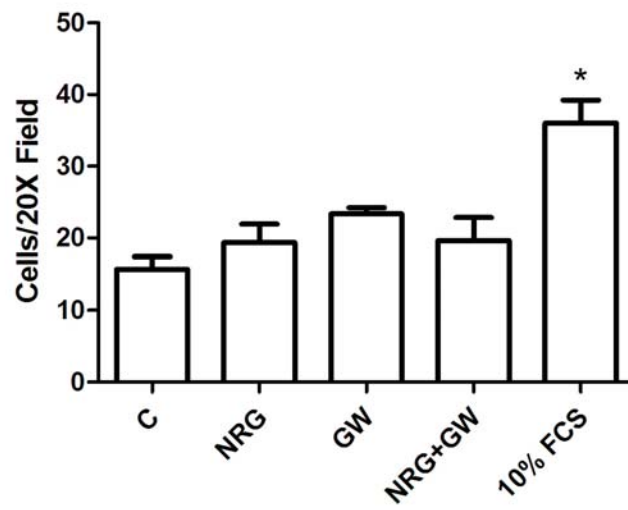

Supplement: supp_01104.2009_figS3.pdf [file supp_01104.2009_figS3.pdf]

# Supplemental Fig 4

A

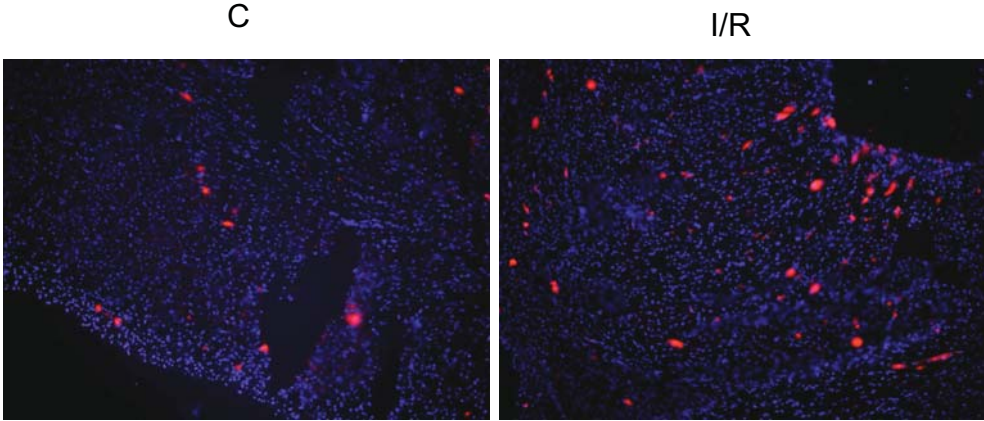

B

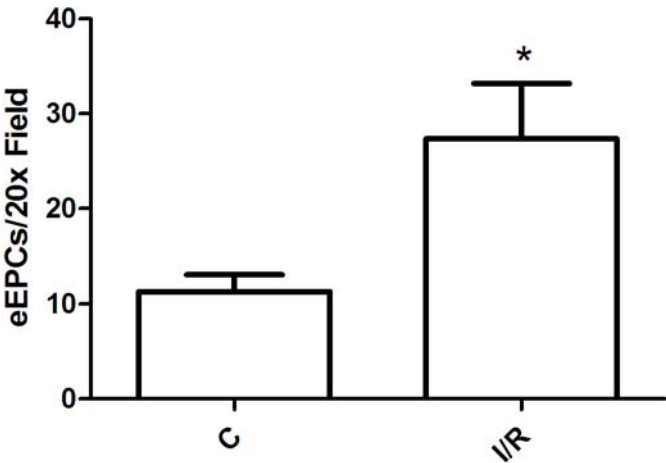

Supplement: supp_01104.2009_figS4.pdf [file supp_01104.2009_figS4.pdf]
